# Supplementary material
Source: Springer Nature journal article supplement (https://www.springermedizin.de/resource/supplementary/12865_2009_263_MOESM4_ESM.pdf/9427628)

**A**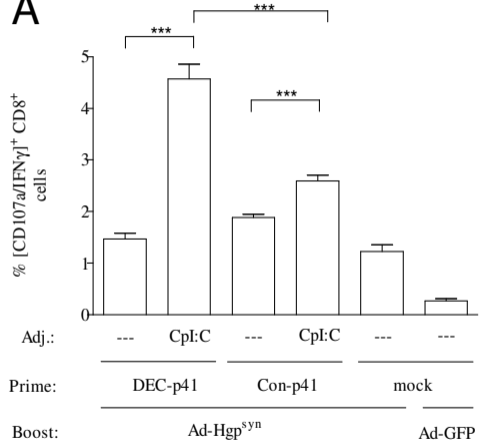**B**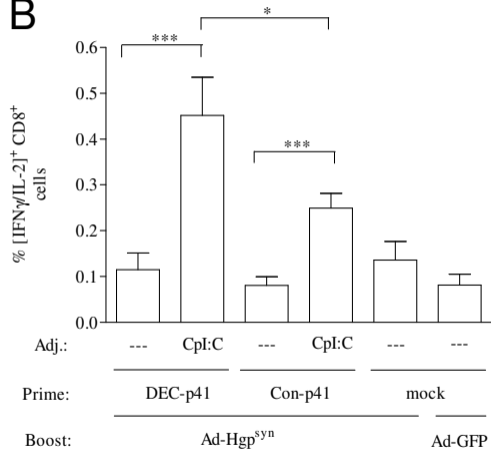

Supplement: MOESM4 [file 9427628]
